# Supplementary material for: Expression of Functional Cannabinoid Type-1 (CB1) Receptor in Mitochondria of White Adipocytes
Source: MDPI journal article supplement (doi:10.3390/cells11162582), 2022-08-19
Supplement: s1 [file s1]

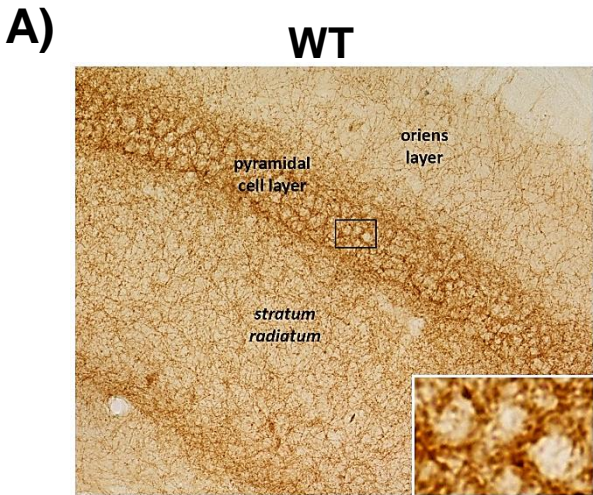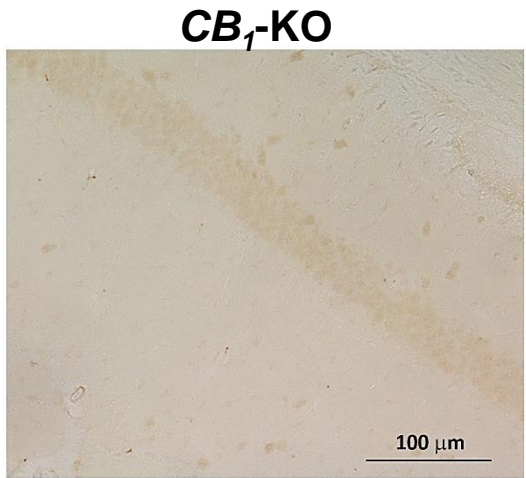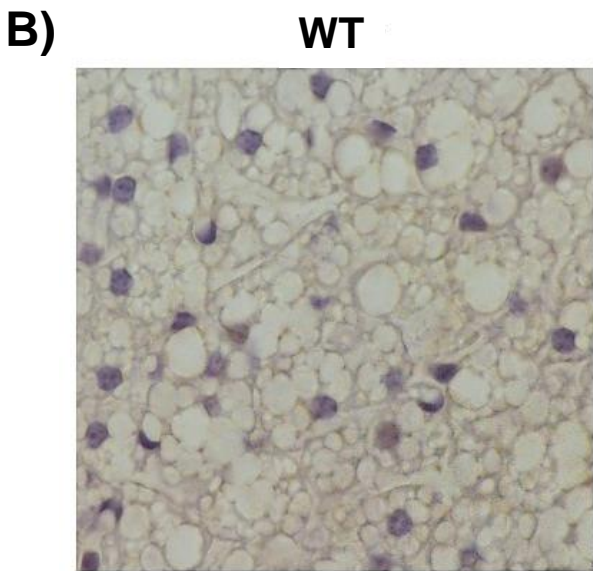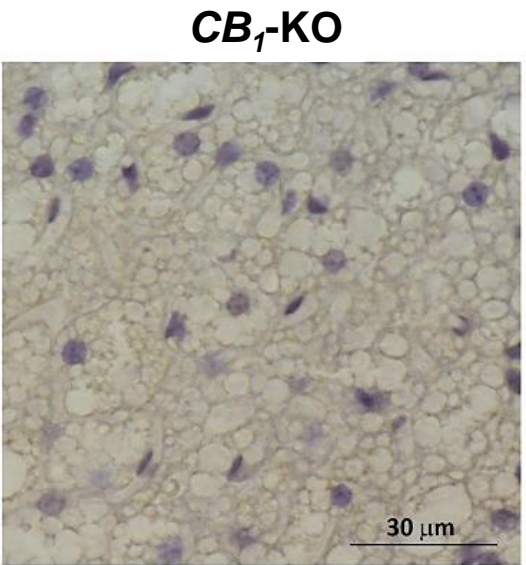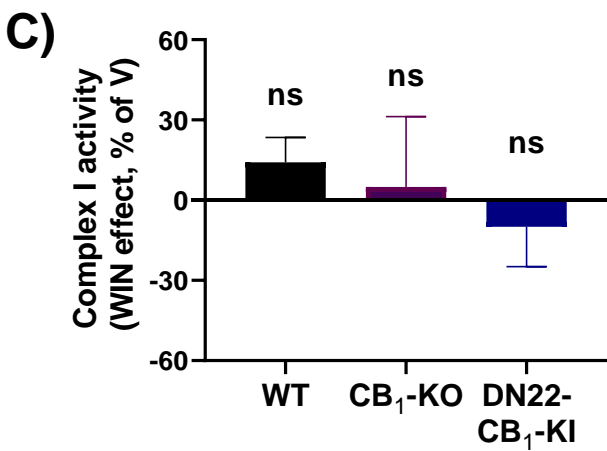

## Figure S1

- A) Immunohistochemical detection of  $CB_1$  receptor in CA1 hippocampal region of WT vs  $CB_1$ -KO mice.
- B) Representative micrograph of  $CB_1$  receptor immunoreactivity in iBAT of WT vs  $CB_1$ -KO mice.
- C) WIN55.212 (WIN 5μM) effect (relative to vehicle, V) on complex I activity in iBAT from WT,  $CB_1$ -KO and DN22- $CB_1$ -KI mice.

| Figure | Conditions                             | "n" (x group) | Analysis (post-hoc reported in figure) | Factor analyzed  | F Ratios                       | P value    |
|--------|----------------------------------------|---------------|----------------------------------------|------------------|--------------------------------|------------|
| 1C     | (WT vs CB1-KO) Total particles         | 6             | Mann-Whitney test                      |                  |                                | P < 0.0001 |
| 1D     | (WT vs CB1-KO) PM particles            | 6             | Mann-Whitney test                      |                  |                                | P = 0.0022 |
| 1E     | (WT vs CB1-KO) Nuclear particles       | 6             | Mann-Whitney test                      |                  |                                | P = 0.0260 |
| 1F     | (WT vs CB1-KO) Cytoplasm particles     | 6             | Mann-Whitney test                      |                  |                                | P = 0.1797 |
| 1G     | (WT vs CB1-KO) MT particles            | 6             | Mann-Whitney test                      |                  |                                | P = 0.0022 |
| 1H     | (WT vs CB1-KO) MT "external" particles | 6             | Mann-Whitney test                      |                  |                                | P = 0.002  |
| 1H     | (WT vs CB1-KO) MT "inside" particles   | 6             | Mann-Whitney test                      |                  |                                | P = 0.0022 |
| 1I     | (WT vs CB1-KO) Mitochondria            | 6             | Mann-Whitney test                      |                  |                                | P = 0.8182 |
| 1J     | (WT vs CB1-KO) CB1+ Mitochondria       | 6             | Mann-Whitney test                      |                  |                                | P = 0.0022 |
| 2A     | WT WIN vs veh                          | 4             | One sample t-test                      |                  |                                | P = 0.028  |
|        | CB1-KO WIN vs veh                      | 4             | One sample t-test                      |                  |                                | P = 0.8794 |
|        | DN22-CB1-KI WIN vs veh                 | 4             | One sample t-test                      |                  |                                | P = 0.6645 |
|        | WT, CB1-KO, DN22-CB1-KI (WIN effect)   | 4             | One way ANOVA (Kruskal-Wallis)         |                  | F (3, 12) = 6.146              | P = 0.0346 |
| S1C    | WT WIN vs veh                          | 4             | One sample t-test                      |                  |                                | P = 0.2279 |
|        | CB1-KO WIN vs veh                      | 4             | One sample t-test                      |                  |                                | P = 0.8645 |
|        | DN22-CB1-KI WIN vs veh                 | 4             | One sample t-test                      |                  |                                | P = 0.5522 |
|        | WT, CB1-KO, DN22-CB1-KI (WIN effect)   | 4             | One way ANOVA (Kruskal-Wallis)         |                  | F (3, 12) = 1.077              | P = 0.6298 |
| 2C     |                                        |               |                                        |                  | Interaction F (3, 36) = 52.33  | P < 0.0001 |
|        | Veh - WIN / WT OXPHOS                  | 7             | Two way ANOVA (Tukey)                  | Treatment x Time | Time F (1, 12 ) = 52.26        | P < 0.0001 |
|        |                                        |               |                                        |                  | Treatment F (1, 12) = 63.18    | P < 0.0001 |
| 2D     |                                        |               |                                        |                  | Interaction F (3, 18) = 2.966  | P = 0.0597 |
|        | Veh - WIN / CB1-KO OXPHOS              | 4             | Two way ANOVA (Tukey)                  | Treatment x Time | Time F (1, 9) = 9.441          | P = 0.0086 |
|        |                                        |               |                                        |                  | Treatment F (1, 12) = 3.561    | P = 0.1081 |
| 2E     |                                        |               |                                        |                  | Interaction F (3, 18) = 0.1173 | P = 0.9488 |
|        | Veh - WIN / Ati-CB1-KO OXPHOS          | 4             | Two way ANOVA (Tukey)                  | Treatment x Time | Time F (1, 6) = 15.64          | P < 0.0001 |
|        |                                        |               |                                        |                  | Treatment F (1, 6) = 0.1072    | P = 0.7545 |
| 2F     |                                        |               |                                        |                  | Interaction F (3, 18) = 0.2201 | P = 0.8811 |
|        | Veh - WIN / DN22-CB1-KI OXPHOS         | 4             | Two way ANOVA (Tukey)                  | Treatment x Time | Time F (1, 6) = 15.64          | P = 0.0827 |
|        |                                        |               |                                        |                  | Treatment F (1, 6) = 0.1651    | P = 0.6986 |
| 2G     | WT WIN vs veh                          | 7             | One sample t-test                      |                  |                                | P < 0.0001 |
|        | CB1-KO WIN vs veh                      | 4             | One sample t-test                      |                  |                                | P = 0.2320 |
|        | Ati-CB1-KO WIN vs veh                  | 4             | One sample t-test                      |                  |                                | P = 0.7055 |
|        | DN22-CB1-KI WIN vs veh                 | 4             | One sample t-test                      |                  |                                | P = 0.6787 |
|        | WT, CB1-KO, DN22-CB1-KI (WIN effect)   | 4-7           | One way ANOVA (Kruskal-Wallis)         |                  | F (4, 19) = 12.99              | P = 0.0003 |
| 3D     | WIN 0.1µM vs veh                       | 7             | One sample t-test                      |                  |                                | P = 0.5970 |
|        | WIN 1 µM vs veh                        | 5             | One sample t-test                      |                  |                                | P = 0.092  |
|        | WIN 2 µM vs veh                        | 5             | One sample t-test                      |                  |                                | P = 0.0044 |
| 3E     | WIN1µM vs veh / veh TREAT              | 17            | One sample t-test                      |                  |                                | P = 0.0004 |
|        | WIN1µM vs veh / veh JD TREAT           | 11            | One sample t-test                      |                  |                                | P = 0.8392 |
|        | WIN1µM vs veh / veh KH7 TREAT          | 8             | One sample t-test                      |                  |                                | P = 0.5416 |
|        | WIN1µM vs veh / veh 8-br-cAMP TREAT    | 6             | One sample t-test                      |                  |                                | P = 0.6591 |
|        | veh TREAT vs JD TREAT                  | 17-11         | Mann Whitney test                      |                  |                                | P = 0.0263 |
|        | veh TREAT vs KH7 TREAT                 | 17-8          | Mann Whitney test                      |                  |                                | P = 0.0376 |
|        | veh TREAT vs 8-br-cAMP TREAT           | 17-6          | Mann Whitney test                      |                  |                                | P = 0.0171 |
| 3F     | WIN1µM vs veh / veh pre TREAT          | 17            | One sample t-test                      |                  |                                | P = 0.0006 |
|        | WIN1µM vs veh / veh JD TREAT           | 11            | One sample t-test                      |                  |                                | P = 0.3654 |
|        | WIN1µM vs veh / veh KH7 TREAT          | 8             | One sample t-test                      |                  |                                | P = 0.2650 |
|        | WIN1µM vs veh / veh 8-br-cAMP TREAT    | 6             | One sample t-test                      |                  |                                | P = 0.8791 |
|        | veh TREAT vs JD TREAT                  | 17-11         | Mann Whitney test                      |                  |                                | P = 0.0433 |
|        | veh TREAT vs KH7 TREAT                 | 17-8          | Mann Whitney test                      |                  |                                | P = 0.0304 |
|        | veh TREAT vs 8-br-cAMP TREAT           | 17-6          | Mann Whitney test                      |                  |                                | P = 0.0133 |

**Figure S2**

Statistical analyses related to figures 1-3 and S1C
